# Supplementary material for: High-quality crack-free GaN epitaxial films grown on Si substrates by a two-step growth of AlN buffer layer
Source: Royal Society of Chemistry journal article supplement (doi:10.1039/c5ce02525g), 2016-01-01
Supplement: c5ce02525g1.pdf [file c5ce02525g1.pdf]

## Supplementary information

### High-quality crack-free GaN epitaxial films grown on Si substrates by two-step growth of AlN buffer layer

Yunhao Lin,<sup>1,2</sup> Meijuan Yang,<sup>1,2</sup> Wenliang Wang,<sup>1,2</sup> Zhiting Lin,<sup>1,2</sup> Junning Gao,<sup>1,2,3\*</sup> and  
Guoqiang Li<sup>1,2,3\*</sup>

<sup>1</sup>State Key Laboratory of Luminescent Materials and Devices, South China University of Technology, Wushan Road, Guangzhou 510640, China.

<sup>2</sup>Engineering Research Center on Solid-State Lighting and its Informationisation of Guangdong Province, South China University of Technology, Wushan Road, Guangzhou 510640, China.

<sup>3</sup>Department of Electronic Materials, School of Materials Science and Engineering, South China University of Technology, Guangzhou 510640, China.

\* Correspondence and requests for materials should be addressed to [msgli@scut.edu.cn](mailto:msgli@scut.edu.cn) or [msjngao@mail.scut.edu.cn](mailto:msjngao@mail.scut.edu.cn)

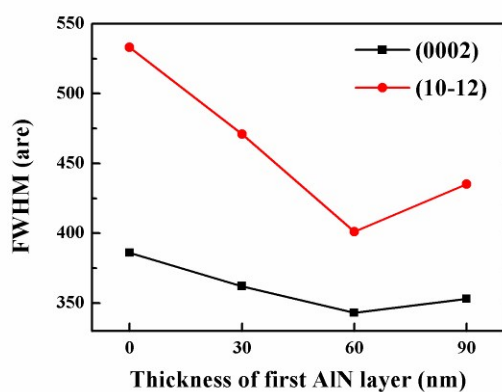

Fig. 1S The thickness dependence of the first AlN layer (AlN-1) on FWHM values of GaN (0002) and GaN (10-12) XRCs for the GaN epitaxial films grown on two-step AlN buffer layers of 140 nm-thick.

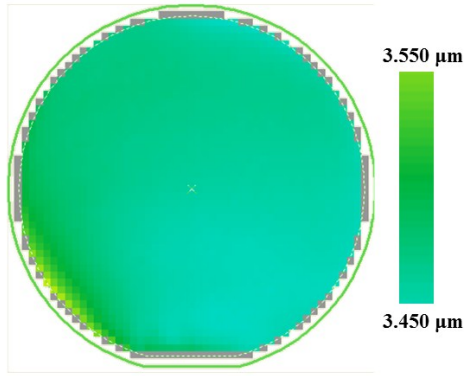

**Fig. 2S** The typical thickness map of as-grown GaN epitaxial films grown on 4-inch Si substrates.

**Table 1S**

The standard deviations of thickness (StdDev) for the as-grown GaN epitaxial films on 4-inch Si substrates with different thicknesses of AlN buffer layer.

| Thickness of AlN buffer layer (nm) | 60 nm  | 80 nm  | 100 nm | 120 nm | 140 nm |
|------------------------------------|--------|--------|--------|--------|--------|
| StdDev for Single-step (nm)        | 0.0721 | 0.0528 | 0.0612 | 0.0429 | 0.0752 |
| StdDev for Two-step (nm)           | 0.0353 | 0.0921 | 0.0525 | 0.0711 | 0.0663 |
